# Supplementary figures and images for: Excitatory and inhibitory synapse reorganization immediately after critical sensory experience in a vocal learner
Source: eLife journal article supplement (doi:10.7554/elife.37571), 2018-10-25

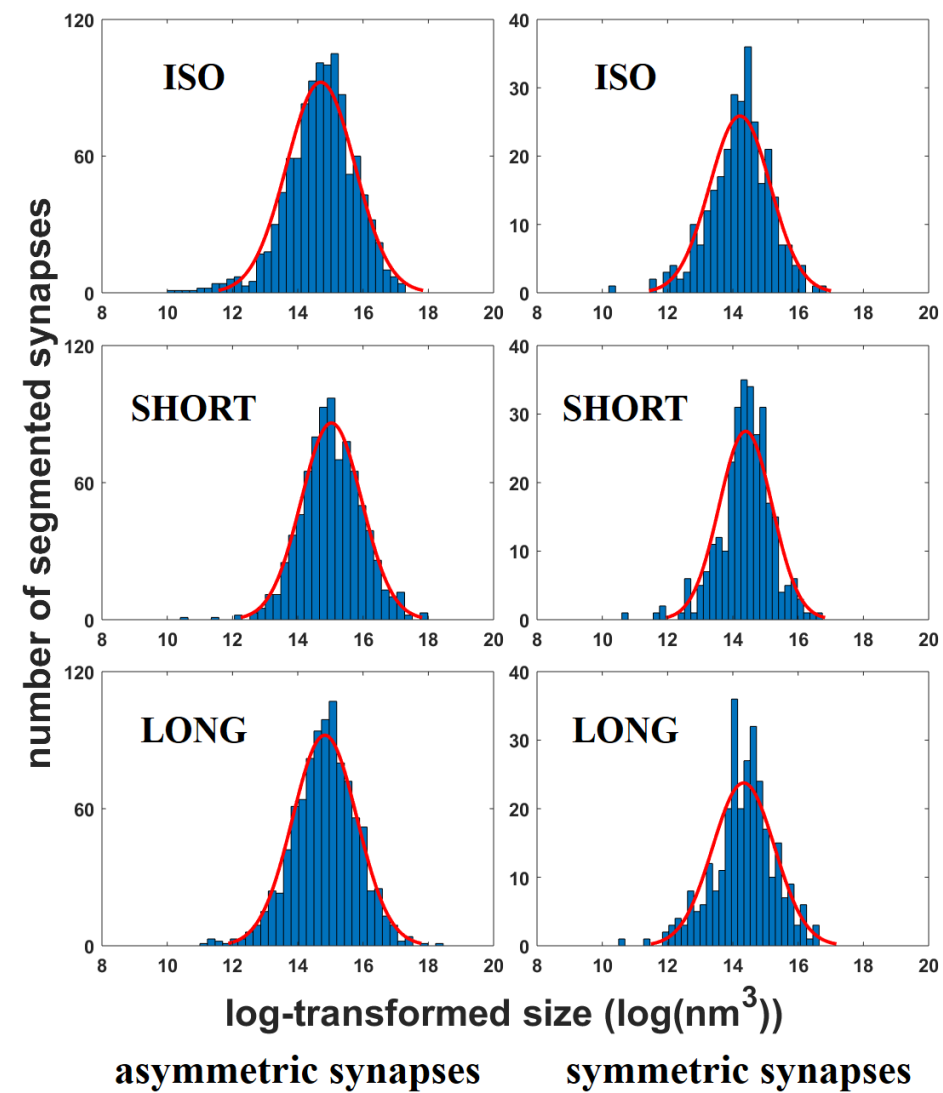

Supplement: supp [file elife-37571-supp-v1.zip]

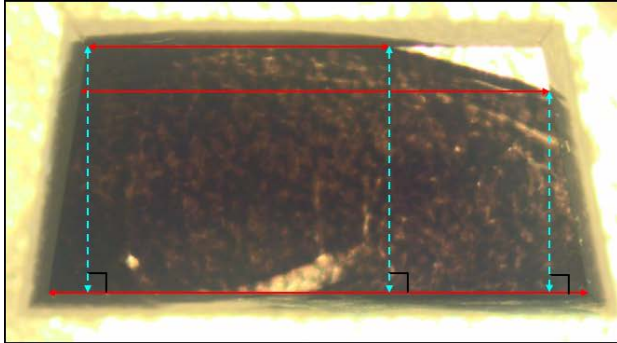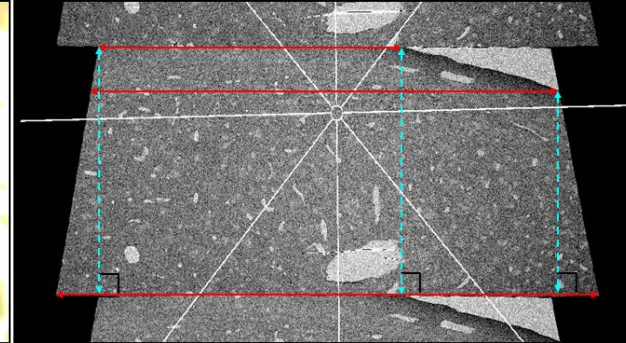

Supplement: supp [file elife-37571-supp-v1.zip]

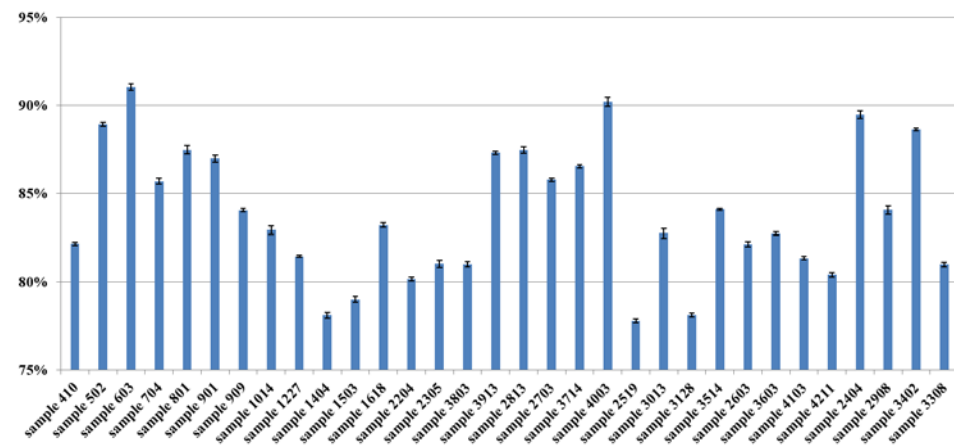

Supplement: supp [file elife-37571-supp-v1.zip]

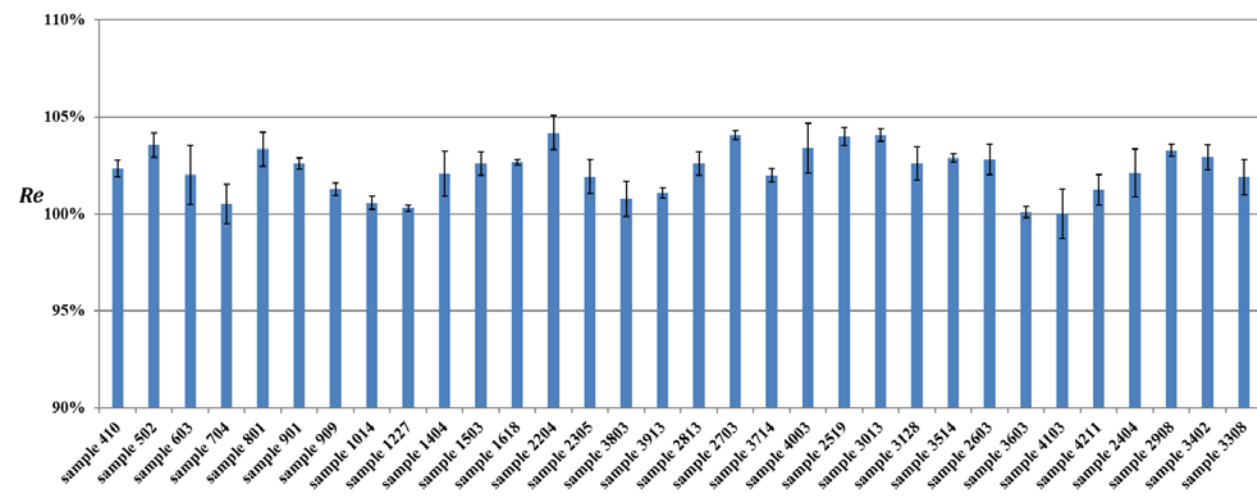

Supplement: supp [file elife-37571-supp-v1.zip]

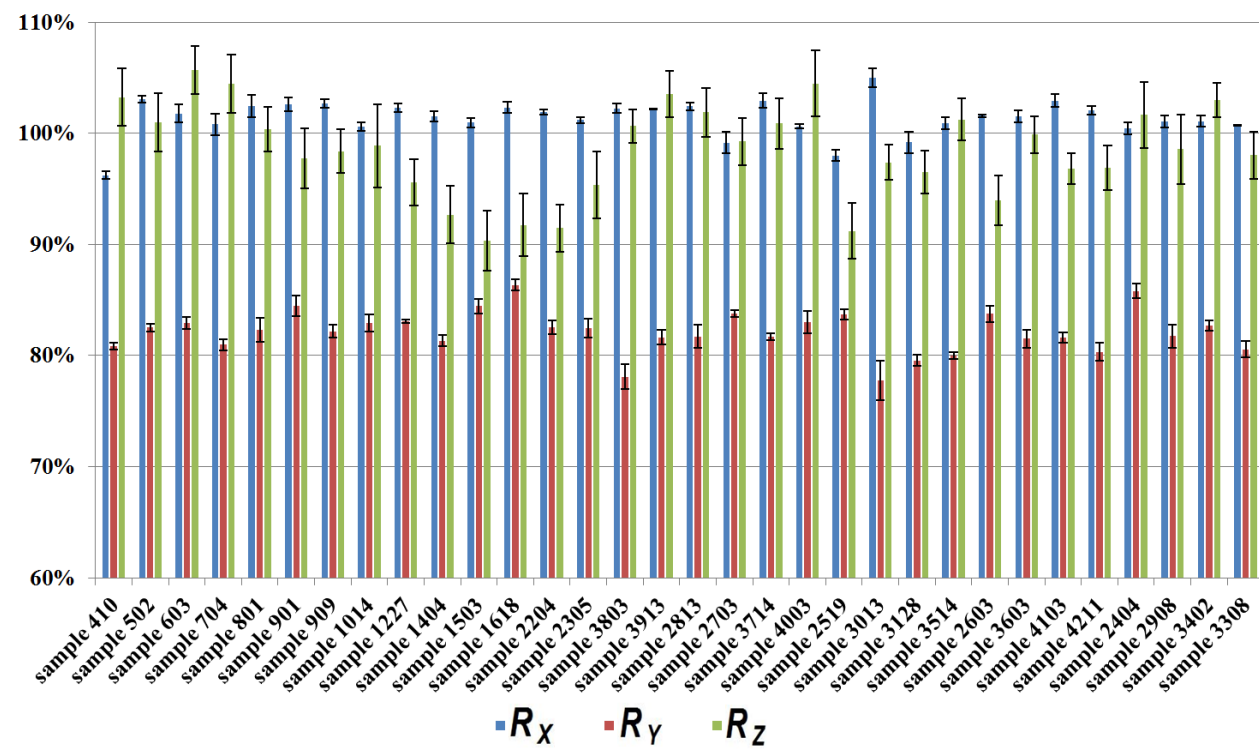

Supplement: supp [file elife-37571-supp-v1.zip]

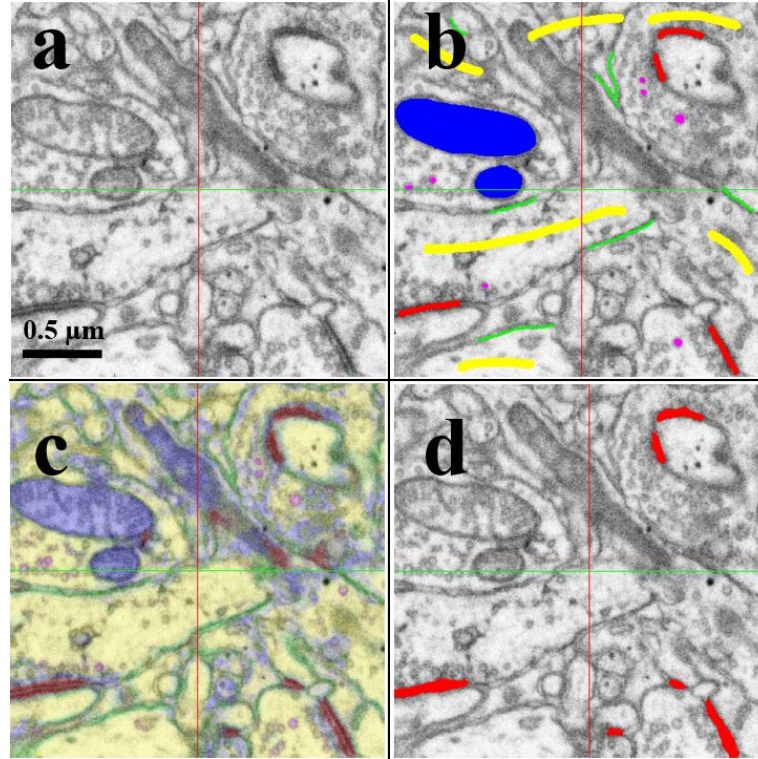

Supplement: supp [file elife-37571-supp-v1.zip]

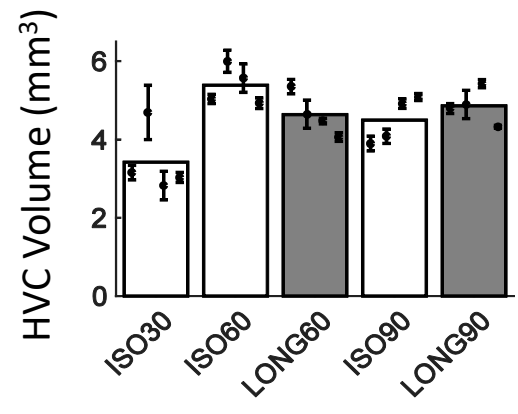

Supplement: supp [file elife-37571-supp-v1.zip]

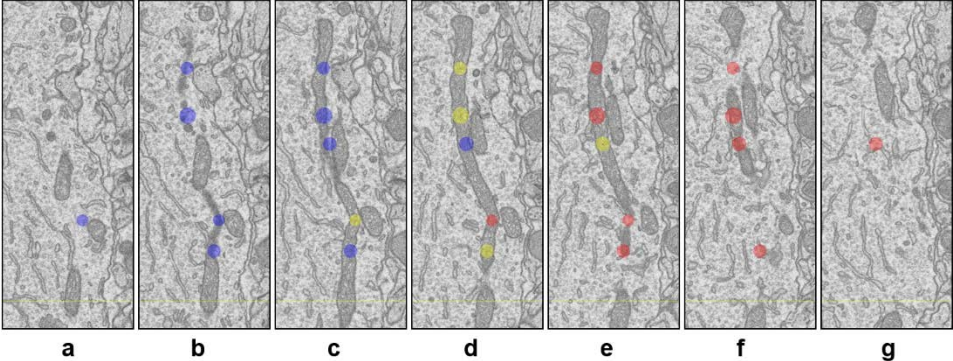

Supplement: supp [file elife-37571-supp-v1.zip]
